# Supplementary material
Source: PubMed Central journal article supplement (PMC9789198)
Supplement: NIHMS1815806-supplement-Supp2.pdf [file NIHMS1815806-supplement-Supp2.pdf]

**Supplemental Table 1. Detailed information about antibodies and reagents.**

| Name                                           | Vendor                    | Catalog number | Application              |
|------------------------------------------------|---------------------------|----------------|--------------------------|
| Anti-Notch1/NICD                               | Cell Signaling Technology | 3608           | WB, IF                   |
| Anti-p-NF- $\kappa$ B-p65(S536)                | Cell Signaling Technology | 3033           | WB, ChIP                 |
| Anti- NF- $\kappa$ B-p65                       | Cell Signaling Technology | 8242           | WB                       |
| Anti- NF- $\kappa$ B-p65                       | Santa Cruz Biotechnology  | sc-514451      | IF                       |
| Anti- $\beta$ -Tubulin                         | Cell Signaling Technology | 2146           | WB                       |
| Anti-ADAM17/TACE                               | Cell Signaling Technology | 3976           | WB                       |
| Anti-rabbit IgG (HRP-linked)                   | Cell Signaling Technology | 7074           | WB                       |
| Anti-mouse IgG (HRP-linked)                    | Cell Signaling Technology | 7076           | WB                       |
| Anti-Delta Antibody (G-1)                      | Santa Cruz Biotechnology  | sc-377310      | WB, IF, IHC              |
| <b>Anti-DLL1</b> (N-terminal)                  | Thermo Fisher Scientific  | PA5-42902      | WB                       |
| Anti-APE1                                      | Thermo Fisher Scientific  | PA5-80342      | WB                       |
| Anti-APE1                                      | Thermo Fisher Scientific  | PA5-29157      | IF, IHC                  |
| Anti- $\beta$ -Actin                           | Sigma-Aldrich             | A1978          | WB                       |
| Goat anti-Mouse IgG (H+L),<br>Alexa Fluor 568  | Thermo Fisher Scientific  | A-111031       | IF                       |
| Goat anti-Rabbit IgG (H+L),<br>Alexa Fluor 488 | Thermo Fisher Scientific  | A-11034        | IF                       |
| Anti-p84                                       | GeneTex                   | GTX70220       | WB                       |
| E3330                                          | Novus Biologicals         | NBP1-<br>49581 | In vitro<br>treatment    |
| <b>APX2009</b>                                 | Sigma-Aldrich             | SML1887        | In vitro<br>treatment    |
| LipoJet™ In Vitro<br>Transfection Kit          | SignaGen Laboratories     | SL100468       | In vitro<br>transfection |
| PolyJet™ In Vitro DNA<br>Transfection Reagent  | SignaGen Laboratories     | SL100688       | In vitro<br>transfection |

**Supplemental Table 2. Sequences of quantitative RT-PCR primers.**

| Gene name | Sequence                                                          |
|-----------|-------------------------------------------------------------------|
| NOTCH1    | F: 5'-TCCACCAGTTTGAATGGTCA-3'<br>R: 5'-AGCTCATCATCTGGGACAGG-3'    |
| NOTCH2    | F: 5'-ATGACTGCCCTAACCACAGG-3'<br>R: 5'-TGCAGTCATCTCCACTCCAG-3'    |
| NOTCH3    | F: 5'-TCTTGCTGCTGGTCATTCTC-3'<br>R: 5'-TGCCTCATCCTCTTCAGTTG-3'    |
| NOTCH4    | F: 5'-TGTGAACGTGATGTCAACGAG-3'<br>R: 5'-ACAGTCTGGGCCTATGAAACC-3'  |
| DLL1      | F: 5'-CCAGGGTTGCACACTTTCTC-3'<br>R: 5'-CTACTACGGAGAGGGCTGCT-3'    |
| DLL3      | F: 5'-CCTGCGCGCTGAATGTC-3'<br>R: 5'-CATCGAAACCTGGAGAGAGG-3'       |
| DLL4      | F: 5'-GTGCAGGTGTAGCTTCGCT-3'<br>R: 5'-AGGCCTGTTTTGTGACCAAG-3'     |
| HES1      | F: 5'-TGAAGAAAGATAGCTCGCGG-3'<br>R: 5'-GGTACTTCCCCAGCACACTT-3'    |
| HES5      | F: 5'-CCGGTGGTGGAGAAGATG-3'<br>R: 5'-TAGTCCTGGTGCAGGCTCTT-3'      |
| HEY1      | F: 5'-CGAAATCCCAAACCTCCGATA-3'<br>R: 5'-TGGATCACCTGAAAATGCTG-3'   |
| HEY2      | F: 5'-GGCACTCTCGGAATCCTATG-3'<br>R: 5'-TTTGAAGATGCTTCAGGCAA-3'    |
| HEYL      | F: 5'-ATCCCTCTGCGTTTCTTCCT-3'<br>R: 5'-ATCGACGTGGGCCAAGA-3'       |
| ADAM17    | F: 5'-GTGGATGGTAAAAACGAAAGCG-3'<br>R: 5'-GGCTAGAACCCTAGAGTCAGG-3' |
| HPRT      | F: 5'-TCCAGCAGGTCAGCAAAGAA-3'<br>R: 5'-TTGGAAAGGGTGTTCATTCCTCA-3' |

**Supplemental Table 3. Sequences of ChIP primers.**

| <b>Name</b>      | <b>Sequence</b>                                                 | <b>Location</b>    |
|------------------|-----------------------------------------------------------------|--------------------|
| DLL1prom-ChIP-A  | F: 5'-TGAAGCCTCCATTTGCTCT-3'<br>R: 5'-GGATCAACAGAGATGTCCACTT-3' | -1893bp to -1730bp |
| DLL1prom -ChIP-B | F: 5'-AGGAGCCGCAGAGTAGCAAT-3'<br>R: 5'-AGGGCACCGTCAAGGTAGAA-3'  | -1670bp to -1482bp |
| DLL1prom-ChIP-C  | F: 5'-AGCCTCGCACAATAACAGG-3'<br>R: 5'-GAGAACCTGGCCTTCAACTC-3'   | -934bp to -741bp   |
| DLL1prom-ChIP-D  | F: 5'-ACCACGAGAGGACACCGAA-3'<br>R: 5'-CAGAGCGAAGCGGCAGTT-3'     | -685bp to -520bp   |
| DLL1prom-ChIP-E  | F: 5'-AACTTCCCGAAACTGCCGC-3'<br>R: 5'-AGCAGGAGGACGAAGTTCG-3'    | -551bp to -361bp   |
| DLL1prom-ChIP-F  | F: 5'-AACTTCGTCCTCCTGCTCG-3'<br>R: 5'-ACAGACGCCAGAGACCCT-3'     | -377bp to -206bp   |

**Supplemental Table 4. Top 100 potential transcription factors regulating DLL1 predicted by GSEA**

|    | ID          | Description | pvalue   | p.adjust | qvalue   | Count |
|----|-------------|-------------|----------|----------|----------|-------|
| 1  | GCCATNTTG   | GCCATNTTG   | 9.34E-62 | 3.94E-59 | 3.44E-60 | 433   |
| 2  | TCANNTGAY   | TCANNTGAY   | 1.25E-54 | 3.50E-52 | 3.06E-53 | 465   |
| 3  | CATTGTYY_S  | CATTGTYY_S  | 1.34E-49 | 2.26E-47 | 1.97E-48 | 363   |
| 4  | RGAANNTTC   | RGAANNTTC   | 2.99E-46 | 3.34E-44 | 2.92E-45 | 439   |
| 5  | CCCNNGGGA   | CCCNNGGGA   | 3.17E-46 | 3.34E-44 | 2.92E-45 | 323   |
| 6  | ETS2_B      | ETS2_B      | 1.03E-42 | 8.64E-41 | 7.56E-42 | 280   |
| 7  | EGR_Q6      | EGR_Q6      | 1.47E-42 | 1.13E-40 | 9.84E-42 | 279   |
| 8  | USF_Q6      | USF_Q6      | 3.98E-42 | 2.79E-40 | 2.44E-41 | 264   |
| 9  | ZNF260_TAR  | ZNF260_TAR  | 4.02E-41 | 2.60E-39 | 2.28E-40 | 469   |
| 10 | E2F1_Q3_01  | E2F1_Q3_01  | 6.42E-40 | 3.50E-38 | 3.06E-39 | 250   |
| 11 | SP1_Q2_01   | SP1_Q2_01   | 6.42E-40 | 3.50E-38 | 3.06E-39 | 250   |
| 12 | PEA3_Q6     | PEA3_Q6     | 6.64E-40 | 3.50E-38 | 3.06E-39 | 262   |
| 13 | NRF2_01     | NRF2_01     | 1.10E-39 | 5.43E-38 | 4.75E-39 | 271   |
| 14 | E4F1_Q6     | E4F1_Q6     | 1.71E-39 | 8.03E-38 | 7.02E-39 | 288   |
| 15 | AP2_Q6      | AP2_Q6      | 2.80E-39 | 1.24E-37 | 1.08E-38 | 258   |
| 16 | TGANNYRGC   | TGANNYRGC   | 5.34E-39 | 2.20E-37 | 1.92E-38 | 301   |
| 17 | USF_Q6_01   | USF_Q6_01   | 5.66E-39 | 2.20E-37 | 1.92E-38 | 244   |
| 18 | MYCMAX_01   | MYCMAX_01   | 5.74E-39 | 2.20E-37 | 1.92E-38 | 256   |
| 19 | ETS1_B      | ETS1_B      | 6.49E-39 | 2.38E-37 | 2.08E-38 | 266   |
| 20 | E2F1_Q6_01  | E2F1_Q6_01  | 8.14E-39 | 2.77E-37 | 2.42E-38 | 243   |
| 21 | ELK1_02     | ELK1_02     | 8.21E-39 | 2.77E-37 | 2.42E-38 | 255   |
| 22 | ERR1_Q2     | ERR1_Q2     | 9.27E-39 | 2.92E-37 | 2.55E-38 | 265   |
| 23 | MAX_01      | MAX_01      | 1.32E-38 | 3.98E-37 | 3.48E-38 | 264   |
| 24 | AP1_C       | AP1_C       | 1.52E-38 | 4.42E-37 | 3.86E-38 | 273   |
| 25 | USF2_Q6     | USF2_Q6     | 1.68E-38 | 4.73E-37 | 4.14E-38 | 253   |
| 26 | CETS1P54_01 | CETS1P54_01 | 1.89E-38 | 4.82E-37 | 4.21E-38 | 263   |
| 27 | E12_Q6      | E12_Q6      | 1.89E-38 | 4.82E-37 | 4.21E-38 | 263   |
| 28 | GABP_B      | GABP_B      | 1.89E-38 | 4.82E-37 | 4.21E-38 | 263   |
| 29 | OLF1_01     | OLF1_01     | 2.16E-38 | 5.36E-37 | 4.68E-38 | 272   |
| 30 | MYCMAX_03   | MYCMAX_03   | 2.69E-38 | 6.31E-37 | 5.51E-38 | 262   |
| 31 | USF_01      | USF_01      | 2.69E-38 | 6.31E-37 | 5.51E-38 | 262   |
| 32 | USF_C       | USF_C       | 2.81E-38 | 6.40E-37 | 5.59E-38 | 280   |
| 33 | ETS_Q4      | ETS_Q4      | 3.45E-38 | 7.51E-37 | 6.56E-38 | 251   |
| 34 | SP1_01      | SP1_01      | 3.47E-38 | 7.51E-37 | 6.56E-38 | 239   |
| 35 | YY1_Q6      | YY1_Q6      | 4.95E-38 | 1.02E-36 | 8.89E-38 | 250   |
| 36 | TTCYNRGAA   | TTCYNRGAA   | 5.32E-38 | 1.07E-36 | 9.33E-38 | 330   |
| 37 | NRF1_Q6     | NRF1_Q6     | 5.48E-38 | 1.08E-36 | 9.40E-38 | 260   |
| 38 | CREB_Q4     | CREB_Q4     | 6.22E-38 | 1.19E-36 | 1.04E-37 | 269   |
| 39 | ZNF784_TAR  | ZNF784_TAR  | 8.79E-38 | 1.59E-36 | 1.39E-37 | 378   |
| 40 | AP1_Q4      | AP1_Q4      | 8.84E-38 | 1.59E-36 | 1.39E-37 | 268   |
| 41 | AP2_Q6_01   | AP2_Q6_01   | 8.84E-38 | 1.59E-36 | 1.39E-37 | 268   |

(Continued)

|    |             |             |          |          |          |     |
|----|-------------|-------------|----------|----------|----------|-----|
| 42 | SP1_Q6      | SP1_Q6      | 1.12E-37 | 1.91E-36 | 1.67E-37 | 258 |
| 43 | ER_Q6_01    | ER_Q6_01    | 1.13E-37 | 1.91E-36 | 1.67E-37 | 276 |
| 44 | NMYC_01     | NMYC_01     | 1.13E-37 | 1.91E-36 | 1.67E-37 | 276 |
| 45 | SP1_Q6_01   | SP1_Q6_01   | 1.45E-37 | 2.40E-36 | 2.10E-37 | 247 |
| 46 | SP1_Q4_01   | SP1_Q4_01   | 1.59E-37 | 2.58E-36 | 2.26E-37 | 257 |
| 47 | CREB_Q2     | CREB_Q2     | 1.79E-37 | 2.79E-36 | 2.44E-37 | 266 |
| 48 | EGR1_01     | EGR1_01     | 1.79E-37 | 2.79E-36 | 2.44E-37 | 266 |
| 49 | WGGAAATGY   | WGGAAATGY   | 2.39E-37 | 3.66E-36 | 3.20E-37 | 369 |
| 50 | ATF_01      | ATF_01      | 3.62E-37 | 5.35E-36 | 4.67E-37 | 264 |
| 51 | HNF4_DR1_Q  | HNF4_DR1_Q  | 3.62E-37 | 5.35E-36 | 4.67E-37 | 264 |
| 52 | ELF5_TARGET | ELF5_TARGET | 4.53E-37 | 6.58E-36 | 5.75E-37 | 417 |
| 53 | ELK1_01     | ELK1_01     | 6.49E-37 | 9.27E-36 | 8.10E-37 | 271 |
| 54 | NGFIC_01    | NGFIC_01    | 6.60E-37 | 9.27E-36 | 8.10E-37 | 253 |
| 55 | AP1_Q4_01   | AP1_Q4_01   | 1.04E-36 | 1.39E-35 | 1.22E-36 | 261 |
| 56 | DR1_Q3      | DR1_Q3      | 1.04E-36 | 1.39E-35 | 1.22E-36 | 261 |
| 57 | PPAR_DR1_Q  | PPAR_DR1_Q  | 1.04E-36 | 1.39E-35 | 1.22E-36 | 261 |
| 58 | IK2_01      | IK2_01      | 1.30E-36 | 1.72E-35 | 1.50E-36 | 269 |
| 59 | TGACCTG_S   | TGACCTG_S   | 1.34E-36 | 1.74E-35 | 1.52E-36 | 251 |
| 60 | IK1_01      | IK1_01      | 1.39E-36 | 1.77E-35 | 1.55E-36 | 277 |
| 61 | GATAAGR_G   | GATAAGR_G   | 1.54E-36 | 1.94E-35 | 1.70E-36 | 292 |
| 62 | RFX7_TARGET | RFX7_TARGET | 1.89E-36 | 2.34E-35 | 2.04E-36 | 463 |
| 63 | TEL2_Q6     | TEL2_Q6     | 2.56E-36 | 2.98E-35 | 2.61E-36 | 239 |
| 64 | AML1_01     | AML1_01     | 2.62E-36 | 2.98E-35 | 2.61E-36 | 267 |
| 65 | AML1_Q6     | AML1_Q6     | 2.62E-36 | 2.98E-35 | 2.61E-36 | 267 |
| 66 | AP1_01      | AP1_01      | 2.62E-36 | 2.98E-35 | 2.61E-36 | 267 |
| 67 | ARNT_01     | ARNT_01     | 2.62E-36 | 2.98E-35 | 2.61E-36 | 267 |
| 68 | HNF4ALPHA   | HNF4ALPHA   | 2.62E-36 | 2.98E-35 | 2.61E-36 | 267 |
| 69 | ATF4_Q2     | ATF4_Q2     | 4.24E-36 | 4.77E-35 | 4.17E-36 | 257 |
| 70 | E2F_02      | E2F_02      | 5.25E-36 | 5.53E-35 | 4.83E-36 | 237 |
| 71 | E2F_Q4      | E2F_Q4      | 5.25E-36 | 5.53E-35 | 4.83E-36 | 237 |
| 72 | E2F1DP1_01  | E2F1DP1_01  | 5.25E-36 | 5.53E-35 | 4.83E-36 | 237 |
| 73 | E2F1DP2_01  | E2F1DP2_01  | 5.25E-36 | 5.53E-35 | 4.83E-36 | 237 |
| 74 | E2F4DP2_01  | E2F4DP2_01  | 5.25E-36 | 5.53E-35 | 4.83E-36 | 237 |
| 75 | ELF1_Q6     | ELF1_Q6     | 5.55E-36 | 5.78E-35 | 5.05E-36 | 247 |
| 76 | ER_Q6_02    | ER_Q6_02    | 6.03E-36 | 6.20E-35 | 5.42E-36 | 256 |
| 77 | PAX4_01     | PAX4_01     | 7.44E-36 | 7.56E-35 | 6.61E-36 | 264 |
| 78 | NFKB_Q6     | NFKB_Q6     | 8.57E-36 | 8.60E-35 | 7.51E-36 | 255 |
| 79 | CEBPB_01    | CEBPB_01    | 1.05E-35 | 1.03E-34 | 9.00E-36 | 263 |
| 80 | E2F_Q6      | E2F_Q6      | 1.08E-35 | 1.03E-34 | 9.00E-36 | 235 |
| 81 | E2F1_Q6     | E2F1_Q6     | 1.08E-35 | 1.03E-34 | 9.00E-36 | 235 |
| 82 | VDR_Q6      | VDR_Q6      | 1.10E-35 | 1.04E-34 | 9.12E-36 | 271 |
| 83 | E2F1_Q3     | E2F1_Q3     | 1.13E-35 | 1.06E-34 | 9.24E-36 | 245 |
| 84 | ER_Q6       | ER_Q6       | 1.43E-35 | 1.32E-34 | 1.16E-35 | 278 |

(Continued)

|     |            |            |          |          |          |     |
|-----|------------|------------|----------|----------|----------|-----|
| 85  | CEBPB_02   | CEBPB_02   | 1.49E-35 | 1.35E-34 | 1.18E-35 | 262 |
| 86  | ZIC1_01    | ZIC1_01    | 1.49E-35 | 1.35E-34 | 1.18E-35 | 262 |
| 87  | NFE2_01    | NFE2_01    | 1.55E-35 | 1.39E-34 | 1.22E-35 | 270 |
| 88  | ARNT_02    | ARNT_02    | 1.73E-35 | 1.49E-34 | 1.30E-35 | 253 |
| 89  | MTF1_Q4    | MTF1_Q4    | 1.73E-35 | 1.49E-34 | 1.30E-35 | 253 |
| 90  | PAX4_03    | PAX4_03    | 1.73E-35 | 1.49E-34 | 1.30E-35 | 253 |
| 91  | TFIIA_Q6   | TFIIA_Q6   | 1.73E-35 | 1.49E-34 | 1.30E-35 | 253 |
| 92  | AP4_01     | AP4_01     | 2.11E-35 | 1.80E-34 | 1.57E-35 | 261 |
| 93  | AP2_Q3     | AP2_Q3     | 2.46E-35 | 2.05E-34 | 1.79E-35 | 252 |
| 94  | ZIC3_01    | ZIC3_01    | 2.46E-35 | 2.05E-34 | 1.79E-35 | 252 |
| 95  | HNF4_01    | HNF4_01    | 3.10E-35 | 2.56E-34 | 2.24E-35 | 268 |
| 96  | NERF_Q2    | NERF_Q2    | 3.49E-35 | 2.83E-34 | 2.47E-35 | 251 |
| 97  | AREB6_03   | AREB6_03   | 4.24E-35 | 3.40E-34 | 2.98E-35 | 259 |
| 98  | E2F_Q6_01  | E2F_Q6_01  | 6.65E-35 | 5.24E-34 | 4.58E-35 | 240 |
| 99  | E2F4DP1_01 | E2F4DP1_01 | 6.65E-35 | 5.24E-34 | 4.58E-35 | 240 |
| 100 | AP2GAMMA   | AP2GAMMA   | 7.05E-35 | 5.50E-34 | 4.81E-35 | 249 |

**Supplemental Table 5. Key transcription factors regulating DLL1 predicted by TRRUST**

| Key TF | # of overlapped genes | P value  | Q value | List of overlapped genes                                                                     |
|--------|-----------------------|----------|---------|----------------------------------------------------------------------------------------------|
| ATF1   | 4                     | 0.000537 | 0.0156  | FLT1,ERBB2,CCNA1,NTS                                                                         |
| SP1    | 17                    | 0.00169  | 0.0245  | LAMA1,F10,TNNI3,AGT,SCNN1B,HYAL1,FBLN1,CYP3A7,GPR39,SRY,CXCL14,KLF8,PLAT,IGF2,ERBB2,PADI3,F7 |
| CREB1  | 6                     | 0.00328  | 0.0277  | NTS,PLAT,FLT1,CYP11A1,RP1,ERBB2                                                              |
| NR1H4  | 3                     | 0.00382  | 0.0277  | UGT2B4,SLCO1B3,DCN                                                                           |
| TFCP2  | 2                     | 0.00859  | 0.0373  | SRY,A2M                                                                                      |
| SP3    | 6                     | 0.00982  | 0.0373  | FBLN1,LAMA1,PADI3,PLAT,ERBB2,CYP3A7                                                          |
| YBX1   | 3                     | 0.0121   | 0.0373  | ERBB2,MIA,AGT                                                                                |
| MEF2A  | 2                     | 0.0128   | 0.0373  | SOST,TNNI3                                                                                   |
| PITX2  | 2                     | 0.0128   | 0.0373  | WNT5A,LEF1                                                                                   |
| SOX10  | 2                     | 0.0128   | 0.0373  | GJC2,MIA                                                                                     |
| JUND   | 3                     | 0.017    | 0.0448  | PLAT,ERBB2,NTS                                                                               |
| NR5A1  | 2                     | 0.0481   | 0.107   | SRY,CYP11A1                                                                                  |
| SOX2   | 2                     | 0.0481   | 0.107   | NTRK3,SEMA6A                                                                                 |
| CREM   | 2                     | 0.0605   | 0.125   | PLAT,CCNA1                                                                                   |
| HNF1A  | 2                     | 0.0649   | 0.125   | SLCO1B3,GPR39                                                                                |
| MYB    | 2                     | 0.119    | 0.215   | ERBB2,CCNA1                                                                                  |
| KLF4   | 2                     | 0.135    | 0.23    | LAMA1,ZNF750                                                                                 |
| VDR    | 2                     | 0.146    | 0.235   | CYP3A7,ERBB2                                                                                 |
| EGR1   | 3                     | 0.168    | 0.257   | FLT1,HYAL1,IGF2                                                                              |
| CEBPA  | 2                     | 0.197    | 0.286   | VLDLR,IGF2                                                                                   |
| JUN    | 4                     | 0.218    | 0.294   | DCN,PLAT,NTS,CYP11A1                                                                         |
| FOS    | 2                     | 0.233    | 0.294   | NTS,NTF3                                                                                     |
| WT1    | 2                     | 0.233    | 0.294   | IGF2,SRY                                                                                     |
| TFAP2A | 2                     | 0.316    | 0.382   | CYP11A1,ERBB2                                                                                |
| ESR1   | 2                     | 0.346    | 0.401   | CRHBP,FLT1                                                                                   |
| YY1    | 2                     | 0.431    | 0.48    | ERBB2,HBE1                                                                                   |
| TP53   | 3                     | 0.492    | 0.528   | GPNMB,FLT1,CCNA1                                                                             |
| NFKB1  | 5                     | 0.538    | 0.557   | HYAL1,IL17C,AGT,CYP3A7,A2M                                                                   |
| RELA   | 4                     | 0.715    | 0.715   | CYP3A7,HYAL1,IL17C,AGT                                                                       |

**Supplemental Table 6. Summary of IHC scores of APE1 and DLL1 protein expression in human EAC tissue microarrays.**

| <b>APE1</b> | <b>Index score</b> |            |             |
|-------------|--------------------|------------|-------------|
|             | <b>0-2</b>         | <b>3-4</b> | <b>6-12</b> |
| NE          | 5                  | 0          | 0           |
| EAC         | 25                 | 11         | 26          |

  

| <b>DLL1</b> | <b>Index score</b> |            |             |
|-------------|--------------------|------------|-------------|
|             | <b>0-2</b>         | <b>3-4</b> | <b>6-12</b> |
| NE          | 5                  | 0          | 0           |
| EAC         | 32                 | 16         | 14          |
